# Supplementary material for: InferBERT: A Transformer-Based Causal Inference Framework for Enhancing Pharmacovigilance
Source: Front Artif Intell. 2021 May 26;4:659622. doi: 10.3389/frai.2021.659622 (PMC8202286; doi:10.3389/frai.2021.659622)
Supplement: Supplementary file 1 [file Table2.XLSX]

## Sheet: Analgesics-induced acute liver 
					Terms		DeepCausalPV						PRR		ROR				EBGM
					Feature	value	z score	probability of do value	probability of not do value	probability difference	p value	support	prr	prr-accept	ror	chi-square	ror-ci	ror-accept	ebgm	QUANT_05	ebgm-accept
					psd	Acetaminophen	153.916	0.83831	0.326136	0.512174	0	4990	2.39648	1	9.1619	4330.94	[8.496521953537334, 9.8793819306571]	1	2	1.95	0
					outcome	Death	119.33	0.678303	0.297816	0.380487	0	11311	2.4514	1	5.88885	5580.36	[5.609154109787245, 6.182494365847825]	1	1.69	1.66	0
					outcome	LifeThreatening	43.7646	0.588833	0.405012	0.183821	0	5488	1.6719	0	2.82003	1234.1	[2.6573582715775728, 2.992668435750369]	1	1.51	1.47	0
					age	18-39	36.0075	0.544736	0.353987	0.190749	0	5350	1.44527	0	2.02022	566.548	[1.9052199106577383, 2.1421666098707117]	1	1.35	1.31	0
					indication	SUICIDE ATTEMPT	34.2306	0.869107	0.348894	0.520214	0	170	1.97791	0	6.36273	112.225	[4.308513212879084, 9.39635025185465]	1	1.7	1.5	0
					psd	Sevoflurane	27.1103	0.844694	0.394362	0.450332	0	121	1.81593	0	4.29092	55.3304	[2.838686047353706, 6.486112334431984]	1	1.54	1.32	0
					indication	HEPATIC NEOPLASM MALIGNANT	24.9836	0.618698	0.349597	0.269101	0	271	1.67273	0	3.17838	84.7725	[2.4554129186965588, 4.114203373616655]	1	1.55	1.38	0
					age	younger than 18	21.3382	0.574043	0.376829	0.197214	0	1687	1.41857	0	1.99175	192.044	[1.8041078500109717, 2.19890797012823]	1	1.38	1.31	0
					psd	Sorafenib Tosylate	20.8579	0.636015	0.393467	0.242548	0	360	1.64246	0	2.99383	102.094	[2.397730663906181, 3.738133355007216]	1	1.54	1.39	0
					gender	Female	17.0693	0.412383	0.352557	0.0598258	0	17843	1.06327	0	1.11068	24.399	[1.0654546684306783, 1.1578176545117886]	1	1.03	1.01	0
					dose	PO	16.9905	0.63689	0.357506	0.279385	0	457	1.49304	0	2.27793	116.304	[1.954578888522777, 2.6547660340314367]	1	1.55	1.41	0
					indication	HEADACHE	13.638	0.66799	0.350904	0.317085	0	139	1.67793	0	3.2213	48.6193	[2.28454696367602, 4.542156483391069]	1	1.47	1.27	0
					indication	PYREXIA	13.2915	0.594989	0.349599	0.245391	0	297	1.45349	0	2.13745	43.2157	[1.6986343887278121, 2.6896209197237706]	1	1.39	1.24	0
					psd	Heparin Sodium	12.8527	0.700154	0.394557	0.305598	0	155	1.71414	0	3.45981	54.3542	[2.444294547906216, 4.8972327796056305]	1	1.51	1.31	0
					psd	Ibuprofen	12.3332	0.499919	0.392849	0.10707	0	1027	1.13651	0	1.25763	13.014	[1.1113010740016211, 1.4232311441666865]	1	1.13	1.04	0
					psd	Rosiglitazone Maleate	10.9548	0.503645	0.395385	0.10826	0	157	1.21243	0	1.42743	4.96077	[1.0531829386105478, 1.934662879166908]	1	1.16	0.99	0
					indication	BACK PAIN	9.37779	0.475643	0.35082	0.124823	0	368	1.11371	0	1.21134	3.1462	[0.9858288093849532, 1.4884363342752749]	0	1.11	0.99	0
					psd	Bromfenac Sodium	9.24415	0.483097	0.395538	0.0875587	0	130	1.39122	0	1.9247	13.3809	[1.3582521428458398, 2.7273788488115476]	1	1.28	1.09	0
					dose	larger than 100 MG	8.93082	0.391539	0.348952	0.0425874	0	6919	0.952714	0	0.921297	8.99296	[0.8734390989925865, 0.971777082760185]	0	0.96	0.93	0
					outcome	RequiredIntervention	8.09142	0.518212	0.434911	0.083301	3.33067e-16	1078	1.27925	0	1.59027	56.5328	[1.4084446474341825, 1.795558551059232]	1	1.26	1.18	0
					indication	MULTIPLE MYELOMA	7.29336	0.538819	0.351458	0.187361	1.51212e-13	170	1.27651	0	1.58759	8.69847	[1.1738955525018855, 2.147081963735185]	1	1.22	1.04	0
					indication	ATRIAL FIBRILLATION	7.01725	0.490182	0.351367	0.138815	1.13143e-12	244	1.21566	0	1.43489	7.61895	[1.1154586637408523, 1.8458058125089063]	1	1.18	1.03	0
					psd	Moxifloxacin Hydrochloride	6.85898	0.584146	0.395277	0.18887	3.46767e-12	111	1.21569	0	1.43531	3.29223	[0.988777109099607, 2.083494132895985]	0	1.16	0.97	0
					indication	BREAST CANCER METASTATIC	6.31691	0.547104	0.351465	0.195638	1.33423e-10	162	1.33985	0	1.76465	12.6152	[1.2934999450088307, 2.4074204562022787]	1	1.26	1.08	0
					psd	Tacrolimus	6.31281	0.553567	0.395292	0.158276	1.37011e-10	129	1.25183	0	1.52397	5.35693	[1.0782021441983574, 2.1540301648000404]	1	1.19	1	0
					psd	Duloxetine Hydrochloride	4.6293	0.483216	0.395242	0.0879743	1.83452e-06	253	0.999407	0	0.998987	0.00314684	[0.7772698005995798, 1.2839489690470813]	0	1.02	0.88	0
					psd	Ciprofloxacin Hydrochloride	4.53749	0.518502	0.395328	0.123174	2.84642e-06	155	1.0411	0	1.0724	0.121516	[0.7799112978822619, 1.4745775672613124]	0	1.05	0.89	0
					dose	ORAL	4.52514	0.421478	0.362137	0.0593407	3.0178e-06	628	0.936647	0	0.896222	2.29365	[0.7801828458370873, 1.0295197699133294]	0	1	0.91	0
					psd	Amiodarone Hydrochloride	4.36616	0.488909	0.395372	0.0935372	6.3226e-06	187	1.03037	0	1.05307	0.0753997	[0.7876242675269668, 1.407971418647311]	0	1.04	0.89	0
					indication	PULMONARY HYPERTENSION	4.12933	0.451625	0.352416	0.0992085	1.81912e-05	108	1.11321	0	1.21045	1.12697	[0.87271388682164, 1.6788961904726185]	0	1.06	0.87	0
					indication	PLASMA CELL MYELOMA	3.98973	0.437101	0.352229	0.0848728	3.3074e-05	175	1.11522	0	1.21451	1.44925	[0.9016451843018901, 1.6359338817828226]	0	1.1	0.94	0
					indication	MULTIPLE SCLEROSIS	3.63582	0.410055	0.351994	0.058061	0.00013855	345	1.03326	0	1.05825	0.267802	[0.8703089757157821, 1.2867656440471558]	0	1.02	0.9	0
					psd	Azithromycin	3.13985	0.47998	0.395533	0.0844468	0.000845184	137	0.913731	0	0.860954	0.581817	[0.6093215275211873, 1.2165046327826579]	0	0.97	0.79	0
					psd	Morphine Sulfate	3.07956	0.430183	0.395713	0.0344696	0.00103653	144	1.05073	0	1.08999	0.191323	[0.7879802021957074, 1.5077506670415264]	0	1.07	0.9	0
					psd	Bevacizumab	3.00763	0.475733	0.395503	0.0802303	0.00131645	158	1.20512	0	1.41023	4.34834	[1.0316951107364012, 1.9276635553294403]	1	1.17	1	0
					psd	Recombinant	2.63077	0.441876	0.395577	0.046299	0.00425961	215	1.03907	0	1.06871	0.211667	[0.8333978753169793, 1.3704748060829046]	0	1.02	0.87	0
					indication	PNEUMONIA	2.22562	0.423904	0.352549	0.0713544	0.0130198	109	1.15852	0	1.30531	2.50419	[0.9528138616255167, 1.7882009264192789]	0	1.09	0.91	0
					psd	Trovafloxacin Mesylate	2.12163	0.437481	0.395634	0.0418471	0.0169344	188	1.07638	0	1.13808	0.649298	[0.8530478669410444, 1.5183455067008662]	0	1.08	0.92	0
					psd	Capecitabine	1.90545	0.452913	0.395672	0.0572409	0.0283609	113	1.00161	0	1.00275	0.00659863	[0.6894093486829254, 1.4585069294747615]	0	1.03	0.85	0
					psd	Olanzapine	1.67283	0.453517	0.395678	0.0578389	0.0471805	108	1.00339	0	1.00581	0.00464576	[0.6856911239357162, 1.4753691194799474]	0	1.03	0.85	0
					psd	Interferon Alfa-2b	1.66199	0.439688	0.395723	0.0439652	0.0482578	105	0.963141	0	0.938568	0.0478319	[0.6348315751414354, 1.3876265422041285]	0	1.01	0.82	0
					psd	Peginterferon Alfa-2a	1.6587	0.441554	0.39571	0.0458442	0.0485877	111	1.17212	0	1.33518	2.04098	[0.9196904680504283, 1.9383864404233475]	0	1.14	0.95	0

## Sheet: Tramadol-related mortalities
Terms		DeepCausalPV						PRR		ROR				EBGM
Feature	value	z score	probability of do value	probability of not do value	probability difference	p value	support	prr	prr-accept	ror	chi-square	ror-ci	ror-accept	ebgm	QUANT_05	ebgm-accept
adversary events	Completed suicide	252.267	0.999966	0.284892	0.715074	0	2871	3.49448	1	499525290000000	5667.88	[0.0, inf]	0	2.76	2.68	1
adversary events	Death	231.711	0.999343	0.320424	0.678919	0	1598	3.10947	1	3390.92	3008.93	[477.2648562092295, 24092.166483005403]	1	2.76	2.64	1
adversary events	Cardio-respiratory arrest	62.3929	0.92611	0.342088	0.584022	0	847	2.70473	1	24.7265	1217.16	[19.03264285127552, 32.12380872939495]	1	2.55	2.4	1
adversary events	Asphyxia	42.6162	0.968117	0.356721	0.611395	0	157	2.70532	1	54.5469	249.27	[22.373466581519644, 132.9862648614172]	1	2.57	2.24	1
adversary events	Cardiac arrest	33.3356	0.809421	0.346481	0.46294	0	810	2.3677	1	8.69329	766.14	[7.247471437438862, 10.427531886213622]	1	2.26	2.12	1
psd	Diphenhydramine Hydrochloride	22.7134	0.907252	0.357419	0.549833	0	140	2.5299	1	17.4759	179.246	[9.870296255093894, 30.94188270713643]	1	2.4	2.07	1
psd	Hydrocodone Bitartrate	23.6682	0.911803	0.357252	0.554551	0	147	2.5042	1	15.0584	297.931	[10.018296402464182, 22.63425273975901]	1	2.38	2.06	1
adversary events	Respiratory arrest	25.863	0.785348	0.350721	0.434627	0	597	2.25254	1	7.03038	489.175	[5.759815453036338, 8.581223640391038]	1	2.17	2.01	1
adversary events	Pulmonary oedema	20.3758	0.809269	0.355026	0.454243	0	313	2.29692	1	8.12168	283.92	[6.088466665042449, 10.833865413224157]	1	2.22	2	1
adversary events	Drug abuse	38.7692	0.739021	0.332587	0.406435	0	1854	2.15617	1	5.12373	1166.95	[4.626009505153946, 5.674991918475002]	1	2.03	1.94	0
adversary events	Poisoning	19.753	0.78464	0.35469	0.42995	0	352	1.33028	0	1.63111	41.2809	[1.4043205782529975, 1.8945177994740487]	1	2.11	1.91	0
adversary events	Toxicity to various agents	51.5316	0.688592	0.300065	0.388527	0	4220	2.34651	1	5.51331	2503.44	[5.131706742511888, 5.923285909789203]	1	1.94	1.88	0
psd	Morphine Sulfate	16.174	0.740027	0.355431	0.384596	0	341	2.07235	1	5.10867	211.707	[4.006734465032886, 6.513661927196435]	1	2.01	1.81	0
psd	Diazepam	15.6888	0.732042	0.35549	0.376552	0	344	2.0206	1	4.65716	193.575	[3.6747663987192674, 5.9021804509807545]	1	1.96	1.76	0
psd	Oxycodone Hydrochloride	12.8521	0.680637	0.356159	0.324477	0	343	1.97445	0	4.29673	185.555	[3.4236864046377375, 5.392392537046873]	1	1.9	1.71	0
adversary events	Accidental overdose	10.8489	0.603943	0.356309	0.247634	0	433	1.76586	0	3.0726	136.873	[2.523854676492944, 3.740666632193806]	1	1.67	1.43	0
adversary events	Multiple organ dysfunction syndrome	11.1234	0.732651	0.35792	0.374731	0	169	1.87672	0	3.69394	70.9073	[2.675005578219065, 5.100983995096109]	1	1.65	1.36	0
psd	Alprazolam	9.10819	0.573858	0.356843	0.217015	0	427	1.62953	0	2.51016	91.4554	[2.0675302958106943, 3.04756201172019]	1	1.46	1.35	0
adversary events	Myocardial infarction	9.19396	0.646387	0.357947	0.28844	0	217	1.74451	0	2.99456	65.5774	[2.2718316189702654, 3.9471956187494617]	1	1.5	1.34	0
adversary events	Pneumonia	9.49749	0.586889	0.356799	0.23009	0	408	1.38667	0	1.76771	54.5108	[1.51798690262713, 2.058510869910079]	1	1.43	1.34	0
adversary events	Brain oedema	7.09202	0.661725	0.358866	0.302859	6.61e-13	124	1.85943	0	3.59924	49.8602	[2.473811409135254, 5.236663559262721]	1	1.52	1.32	0
psd	Fentanyl	7.66231	0.557094	0.357638	0.199456	9.1e-15	356	1.65994	0	2.62475	99.0821	[2.1573637006859596, 3.193402618262667]	1	1.41	1.32	0
dose	PO	11.6544	0.70483	0.193769	0.511061	0	109	1.18803	0	1.32904	4.82442	[1.0378053891193764, 1.7020144537036277]	1	1.54	1.32	0
adversary events	Pulmonary embolism	7.07617	0.664535	0.358909	0.305625	7.41e-13	119	1.82024	0	3.38069	43.5164	[2.314470302645575, 4.938077998647546]	1	1.48	1.32	0
indication	SUICIDE ATTEMPT	14.0884	0.530519	0.149928	0.380591	0	339	1.53659	0	2.19674	52.9965	[1.7708907283916933, 2.7250035199974763]	1	1.4	1.31	0
psd	Citalopram Hydrobromide	6.1576	0.534196	0.358282	0.175915	3.69e-10	304	1.50113	0	2.08817	41.4704	[1.6642739212407773, 2.6200399755805353]	1	1.39	1.3	0
psd	Quetiapine Fumarate	5.45874	0.555721	0.358872	0.19685	2.4e-08	190	1.54968	0	2.24331	31.1623	[1.682982710707591, 2.99020237387531]	1	1.39	1.3	0
adversary events	Sepsis	5.92813	0.58202	0.358852	0.223168	1.53e-09	170	1.55699	0	2.26789	29.1042	[1.677948459582969, 3.065234727170579]	1	1.39	1.3	0
psd	Mirtazapine	4.1	0.509541	0.359268	0.150273	2.07e-05	177	1.50574	0	2.10513	24.5029	[1.564599198677339, 2.8324063806013187]	1	1.38	1.29	0
dose	ORAL	16.9152	0.489378	0.176024	0.313354	0	725	1.51452	0	2.11358	128.13	[1.852385468303947, 2.4116084122439303]	1	1.36	1.29	0
adversary events	Toxic epidermal necrolysis	4.45354	0.541082	0.359277	0.181805	4.22e-06	145	1.531	0	2.18453	22.0618	[1.5732914094599069, 3.033250193240489]	1	1.38	1.29	0
adversary events	Circulatory collapse	4.84361	0.522562	0.358978	0.163585	6.38e-07	211	1.43426	0	1.89833	21.5213	[1.4474784890466863, 2.4896125511652434]	1	1.37	1.28	0
adversary events	Medication error	5.00488	0.51498	0.358794	0.156186	2.79e-07	253	1.41635	0	1.8495	23.7543	[1.4436404344605538, 2.3694563869662786]	1	1.37	1.28	0
adversary events	Drug level increased	3.35266	0.514527	0.359579	0.154948	0.0004002	117	1.4216	0	1.86539	11.0261	[1.2970630543380781, 2.682746527039663]	1	1.36	1.27	0
psd	Sertraline Hydrochloride	3.97501	0.485558	0.359098	0.12646	3.52e-05	247	1.35997	0	1.70566	17.2741	[1.3274292660734328, 2.1916670987631015]	1	1.35	1.27	0
psd	Zolpidem Tartrate	4.43301	0.498401	0.358939	0.139462	4.65e-06	255	1.37204	0	1.73543	19.0733	[1.3559510251311364, 2.2211086893682803]	1	1.36	1.27	0
psd	Clonazepam	2.71638	0.468596	0.35962	0.108976	0.00329996	156	1.33288	0	1.6411	9.17584	[1.1975831530896843, 2.2488695034907344]	1	1.35	1.26	0
adversary events	Cardiac failure	3.0528	0.493663	0.359605	0.134059	0.00113358	130	1.25776	0	1.47179	7.22248	[1.1167181646196953, 1.9397648568942436]	1	1.34	1.25	0
age	18-39	15.5879	0.45448	0.339438	0.115042	0	5773	1.34927	0	1.63971	271.786	[1.5457000668351737, 1.7394323558811613]	1	1.27	1.24	0
adversary events	Overdose	10.7882	0.470014	0.351058	0.118956	0	2104	1.28646	0	1.52547	85.8587	[1.3946983401573518, 1.6684936979126341]	1	1.29	1.24	0
adversary events	Respiratory depression	5.11925	0.478129	0.358278	0.119851	1.53e-07	447	1.2684	0	1.49373	17.3514	[1.2379962179794546, 1.8022967126425464]	1	1.33	1.24	0
age	40-64	18.3306	0.439257	0.321194	0.118062	0	9171	1.37825	0	1.67766	387.075	[1.5931065474484536, 1.7667029883080103]	1	1.23	1.2	0
psd	Gabapentin	3.71502	0.447649	0.35883	0.0888193	0.000101595	434	1.27585	0	1.50987	18.498	[1.252498088740615, 1.8201259881323797]	1	1.31	1.2	0
psd	Acetaminophen	2.78924	0.419419	0.359088	0.0603306	0.00264162	522	1.21992	0	1.3916	18.0664	[1.1958460886445963, 1.6193998904168219]	1	1.27	1.12	0
psd	Fluoxetine Hydrochloride	1.80285	0.443681	0.359891	0.0837905	0.035706	115	1.17993	0	1.31351	1.82265	[0.9068933761166035, 1.902432765006727]	0	1.31	1.1	0
psd	Venlafaxine Hydrochloride	1.72545	0.424544	0.359831	0.0647127	0.042223	174	1.13005	0	1.21969	1.4547	[0.9005508110081032, 1.6519307879447644]	0	1.28	1.02	0
gender	Male	3.62421	0.365468	0.343632	0.0218366	0.000144921	10840	1.0281	0	1.04443	2.80999	[0.9930535192704131, 1.0984641671815967]	0	1.02	0.99	0
indication	ANALGESIC THERAPY	5.28351	0.305934	0.157545	0.148389	6.34e-08	269	0.800782	0	0.719426	5.69696	[0.5522022086899613, 0.9372896565045059]	0	0.79	0.66	0
indication	DEPRESSION	2.24837	0.204985	0.159402	0.0455824	0.0122762	399	0.5044	0	0.392855	58.9759	[0.3073851161018405, 0.5020900476342913]	0	0.52	0.42	0
indication	SCIATICA	1.81061	0.227537	0.160256	0.0672813	0.0351006	122	0.588626	0	0.477213	11.0376	[0.3091821081113295, 0.7365626893095242]	0	0.58	0.42	0
