# Supplementary material for: InferBERT: A Transformer-Based Causal Inference Framework for Enhancing Pharmacovigilance
Source: Front Artif Intell. 2021 May 26;4:659622. doi: 10.3389/frai.2021.659622 (PMC8202286; doi:10.3389/frai.2021.659622)
Supplement: Supplementary file 2 [file Table1.XLSX]

## Sheet: sequence length of dataset 1
57
46
49
44
36
45
29
24
46
47
57
69
39
41
40
39
42
57
42
41
29
34
49
30
46
60
57
55
24
34
51
74
34
17
44
49
37
28
36
41
44
36
56
35
44
44
36
55
68
23
41
65
36
52
46
37
40
73
39
63
52
35
37
41
35
31
50
36
35
40
37
47
50
45
71
35
35
40
68
52
43
55
41
35
54
77
32
33
73
43
45
34
55
30
38
71
29
50
35
69
35
57
46
45
52
41
29
40
33
33
35
49
39
35
47
35
36
35
66
47
35
31
40
47
35
35
35
40
48
51
38
48
38
51
32
46
49
39
50
50
55
45
31
38
42
31
44
40
33
29
43
36
35
35
51
30
32
49
29
37
33
57
46
47
43
37
39
48
41
56
73
49
32
57
42
64
60
57
60
47
40
59
41
43
43
36
48
40
30
44
54
42
53
37
52
48
36
57
47
45
60
51
51
26
37
48
40
59
35
32
32
35
37
57
67
58
45
25
42
57
53
57
35
58
66
45
44
43
49
41
54
71
54
45
35
23
40
59
57
45
51
51
54
16
49
51
35
35
52
48
40
51
54
42
47
31
44
29
45
45
48
44
45
42
29
16
34
50
48
58
54
43
43
45
22
52
35
34
48
48
37
64
34
46
40
36
40
57
31
35
52
43
68
29
24
44
40
35
37
50
40
46
57
42
34
17
34
44
37
38
31
39
45
34
37
35
31
41
54
43
60
36
54
60
44
54
38
21
44
54
39
37
54
33
44
53
40
37
24
27
35
29
29
23
41
37
20
50
65
43
40
50
37
29
61
40
32
19
33
43
40
33
42
34
45
25
51
34
37
41
59
40
43
36
51
43
36
24
19
45
23
24
29
31
48
43
55
41
48
65
49
39
43
42
78
29
42
23
35
53
42
52
48
60
44
42
83
46
44
35
47
57
38
54
22
38
35
42
37
46
38
44
30
60
46
47
78
48
47
26
41
31
54
35
63
35
45
52
73
34
48
35
43
37
41
30
41
45
39
49
38
22
36
43
36
35
37
41
64
37
37
40
23
54
30
31
41
27
46
35
56
44
21
44
45
29
40
54
52
49
35
19
24
49
35
34
32
33
44
24
46
43
32
62
35
21
41
44
57
19
39
49
30
42
21
44
19
23
31
50
44
45
35
44
48
23
21
74
48
67
49
38
41
44
44
51
57
35
67
48
50
29
29
23
21
57
48
49
59
57
41
57
34
52
37
35
55
67
43
36
51
46
83
45
34
56
57
52
52
59
51
57
49
23
41
28
41
31
31
59
42
41
47
41
38
45
58
28
36
37
27
31
51
46
46
41
42
42
42
42
23
51
38
42
56
42
47
36
37
40
42
51
52
49
64
46
51
42
52
45
29
46
28
64
52
62
41
48
31
47
36
42
52
49
42
36
39
23
51
41
52
58
39
50
46
45
42
35
41
36
51
39
31
41
40
41
51
42
22
39
42
36
51
36
42
51
47
41
42
38
42
38
50
36
40
41
40
34
37
42
39
17
41
42
22
33
42
44
35
51
39
67
24
53
43
36
36
53
44
32
33
57
54
33
41
38
53
58
34
34
51
32
33
28
51
37
39
39
31
31
43
37
44
33
36
57
52
49
46
35
45
51
53
66
23
45
55
46
38
33
42
46
43
47
38
45
45
28
33
38
36
58
58
37
48
65
33
25
33
56
39
39
33
48
22
32
41
54
55
51
50
35
33
34
33
32
36
47
31
42
42
30
47
45
37
38
45
45
23
30
52
35
17
42
44
40
32
38
43
42
42
29
43
35
52
44
29
49
35
49
44
41
42
30
28
36
52
38
42
28
50
35
28
49
59
34
44
44
44
35
44
32
48
47
35
47
50
46
43
36
80
30
40
48
23
17
57
38
48
36
65
53
50
59
46
45
58
28
38
35
38
46
23
23
30
23
38
59
53
22
37
51
54
32
72
32
46
49
53
53
55
36
39
54
66
24
29
33
42
31
49
54
19
35
49
49
52
54
22
51
30
22
54
34
33
23
30
49
38
36
38
44
11
11
11
48
49
26
24
36
40
41
25
46
42
42
43
34
33
45
39
22
44
32
54
23
43
42
48
38
51
36
32
86
23
40
36
33
47
49
45
48
29
54
63
54
24
43
63
47
30
47
44
30
34
17
37
27
43
37
44
54
39
44
35
35
64
37
53
49
31
29
41
36
44
34
51
29
36
29
25
32
47
40
47
60
39
55
71
40
32
35
36
69
36
38
36
38
53
38
33
71
43
44
38
38
38
36
34
36
36
37
44
44
31
38
33
45
33
45
38
48
41
28
35
49
36
47
36
36
28
35
68
40
29
54
43
43
30
43
35
47
26
30
44
43
52
48
33
16
48
40
31
29
42
40
31
52
44
32
55
54
41
23
43
30
22
27
28
46
30
63
17
29
45
28
28
47
23
41
39
27
30
53
31
22
29
30
29
26
11
25
39
35
35
28
58
32
38
56
46
29
46
43
17
23
17
23
44
28
19
29
37
48
42
51
63
35
28
45
41
17
32
29
29
28
46
64
49
39
48
43
37
65
38
39
49
17
42
40
35
17
29
41
42
31
51
54
42
35
28
31
41
36
29
44
33
46
40
52
52
48
40
44
61
53
24
46
43
31
29
57
44
44
31
44
48
46
38
37
52
58
30
20
31
31
51
57
32
47
51
29
36
57
52
52
51
29
45
41
59
28
25
58
23
20
40
40
37
40
28
34
37
32
37
47
30
22
29
35
43
30
40
35
35
36
39
28
41
29
36
57
30
38
43
48
25
32
28
31
46
52
38
28
42
50
29
40
61
36
31
43
23
61
57
43
37
22
36
38
30
46
36
42
33
37
33
40
37
61
43
49
48
33
41
56
29
43
32
29
42
35
55
30
43
39
41
46
32
43
39
37
39
32
52
31
36
23
37
56
29
28
43
45
46
37
47
11
41
42
39
43
23
29
38
39
34
30
26
43
43
36
11
70
17
70
29
12
27
31
46
40
28
36
22
41
29
45
45
45
60
29
37
58
31
60
29
48
25
21
30
31
29
18
34
49
37
64
35
45
29
47
38
45
60
40
35
30
46
23
30
35
41
38
28
27
34
34
32
45
30
30
30
30
44
37
37
48
29
31
30
49
32
37
39
37
31
36
24
45
27
30
39
38
16
12
35
25
22
30
35
47
40
31
23
24
41
32
46
42
30
33
38
33
44
41
46
38
35
43
32
41
41
43
48
29
59
24
45
49
51
46
51
58
53
37
33
47
33
30
32
74
41
57
40
42
32
36
44
38
49
36
38
48
46
40
55
34
37
37
38
74
36
63
32
36
46
50
41
39
43
41
35
40
35
54
69
42
36
43
35
44
41
24
41
61
32
53
45
52
23
58
49
27
38
55
49
46
35
47
34
35
29
35
43
41
68
38
40
52
42
44
44
64
40
27
51
38
49
43
53
26
44
44
48
49
30
29
36
31
56
32
29
42
30
35
47
41
45
36
58
58
42
50
50
34
42
41
52
44
41
37
35
42
41
42
42
36
41
39
40
34
28
58
58
24
32
34
40
41
49
37
59
49
36
40
58
54
31
37
43
44
33
28
34
42
36
39
56
35
42
42
56
47
32
31
34
36
44
42
47
32
42
40
37
45
55
42
34
36
40
38
41
43
40
49
41
42
48
41
55
56
35
47
41
39
37
45
34
49
36
46
41
45
47
40
57
70
35
39
56
49
54
60
31
48
40
63
47
46
54
35
32
35
37
49
58
36
58
32
63
52
47
32
30
58
36
42
38
38
36
41
48
43
34
36
42
35
60
35
34
38
68
38
54
49
48
49
45
53
33
32
36
35
34
34
43
34
42
54
43
38
35
35
31
41
51
62
58
39
50
50
43
41
47
50
37
44
39
49
29
54
35
44
32
37
36
34
44
57
48
78
40
41
64
35
36
35
57
48
36
52
32
57
51
52
30
36
55
43
37
36
37
45
36
58
40
46
40
46
58
58
28
37
29
37
41
50
44
45
43
42
40
47
46
49
36
37
42
51
35
51
33
37
41
42
37
46
45
38
39
36
42
39
41
29
51
42
37
48
46
42
44
40
30
51
41
41
53
37
50
42
42
48
29
59
58
37
42
37
40
42
37
59
36
42
32
31
34
54
50
37
44
48
55
28
78
46
51
42
36
51
42
45
29
44
38
35
40
41
41
42
38
29
33
33
43
38
37
35
32
37
41
31
37
32
41
43
43
26
42
45
63
42
35
36
39
53
41
49
46
31
49
34
34
49
31
29
53
50
37
48
38
32
32
32
28
41
34
45
55
56
32
41
45
47
48
49
57
35
35
35
40
36
38
43
39
52
38
48
65
48
35
35
57
45
48
46
48
38
32
34
36
58
35
36
34
55
38
39
33
26
43
33
70
42
47
48
48
66
65
39
53
39
28
59
36
35
46
48
49
52
39
45
52
41
48
44
46
35
37
35
45
37
52
46
49
48
38
49
53
41
46
38
39
47
37
43
42
48
[truncated: 34,661 more rows]

## Sheet: sequence length of dataset 2
52
42
69
93
87
110
47
43
174
41
34
171
60
54
60
110
98
110
32
78
64
28
42
53
206
124
39
65
71
57
46
63
51
56
38
114
42
29
114
68
129
33
73
73
49
145
61
47
42
40
34
36
137
37
55
121
55
49
53
94
40
73
47
49
64
136
71
48
159
41
42
70
51
51
46
41
40
83
51
120
53
118
58
60
65
61
42
146
127
128
160
43
67
75
97
41
48
46
51
198
157
53
69
49
33
69
76
27
41
58
45
60
37
28
63
58
327
127
42
86
41
29
65
159
64
37
39
99
85
46
37
33
78
65
181
46
49
44
41
49
58
33
128
80
84
53
84
74
70
38
59
46
58
47
32
35
56
75
48
70
72
61
66
35
52
88
33
58
32
91
72
51
78
72
74
127
77
84
38
62
35
52
57
47
80
78
133
28
41
51
238
88
115
88
102
42
66
51
39
81
70
46
47
41
91
74
71
103
49
36
36
36
36
47
32
35
46
87
82
38
32
77
71
45
54
37
72
55
46
88
75
42
68
37
69
49
71
66
79
86
62
44
52
66
53
137
46
52
49
79
54
74
58
78
149
59
72
40
66
58
40
112
66
175
261
46
87
42
30
43
70
97
64
112
61
65
119
83
45
44
54
55
47
120
60
39
62
41
57
56
44
94
32
109
50
38
129
44
51
51
39
57
42
48
81
84
51
55
38
54
89
55
89
44
47
63
37
43
42
60
25
51
62
56
222
65
76
102
102
71
27
47
62
91
54
38
32
95
32
47
27
46
72
155
99
79
48
73
66
47
72
41
61
44
30
91
123
125
117
55
55
91
63
62
81
58
82
39
34
48
102
54
50
61
52
28
81
44
67
122
73
77
33
45
74
32
54
94
93
47
42
50
33
31
42
38
39
23
33
40
77
56
54
54
38
45
41
38
39
39
44
69
47
53
48
38
72
34
42
39
47
43
38
37
33
28
41
41
24
49
40
46
61
38
33
62
37
39
43
41
153
96
78
30
30
40
40
87
48
80
116
38
53
39
44
68
24
77
67
144
51
56
113
57
51
32
61
64
135
64
78
60
45
67
52
30
46
24
41
48
34
50
79
43
62
39
40
70
48
54
61
51
71
44
77
100
40
51
71
36
32
48
49
59
33
40
48
40
52
54
91
79
44
41
53
37
83
57
36
80
43
45
60
58
28
44
70
46
29
51
42
68
42
160
32
52
67
38
62
31
44
81
45
50
105
36
147
32
60
53
66
86
104
110
72
77
82
40
60
39
35
44
50
32
47
31
35
45
45
54
32
22
28
46
48
35
49
22
52
42
38
53
72
62
54
72
62
65
166
86
76
83
71
41
28
42
103
61
65
45
33
47
46
42
36
29
37
75
73
59
55
88
67
39
66
86
29
44
64
45
54
54
51
53
49
45
40
43
59
42
49
51
114
60
82
36
53
89
39
54
61
71
63
49
53
48
53
144
69
44
42
49
24
71
32
36
58
61
68
47
49
91
95
46
53
57
116
46
60
50
39
65
46
38
47
56
53
81
67
70
47
78
53
63
116
49
58
69
121
25
41
53
37
35
64
72
81
56
39
30
75
96
50
53
45
110
169
34
42
204
45
54
60
58
63
30
81
43
54
49
74
33
65
83
39
60
80
72
66
105
63
27
57
58
81
45
51
44
42
53
48
123
59
47
89
61
64
95
66
66
47
44
64
68
44
22
27
26
28
38
49
51
32
28
28
28
27
32
27
28
43
27
28
55
38
43
46
38
41
28
45
28
28
42
42
55
32
34
39
39
37
53
29
24
82
70
59
79
74
102
54
220
69
70
60
109
43
53
76
75
71
102
38
36
86
118
122
51
47
44
59
71
135
95
64
74
30
103
75
138
48
153
70
41
90
69
55
46
30
36
43
110
73
81
37
48
85
42
72
51
267
219
61
90
170
36
80
62
45
81
81
68
71
63
51
75
47
64
67
214
59
82
49
36
113
119
37
55
87
62
119
77
49
85
61
103
77
124
89
43
51
93
108
111
59
176
45
49
75
78
73
41
75
48
52
60
56
48
70
50
36
43
56
47
62
36
204
53
54
59
54
34
63
32
36
70
126
91
32
41
86
53
48
105
58
55
37
46
37
52
42
95
49
53
39
123
62
37
59
69
148
67
71
38
168
39
65
69
118
41
63
32
107
51
41
32
34
95
36
38
48
39
38
75
74
108
97
58
38
57
51
128
40
103
40
52
62
28
53
30
39
39
34
51
52
118
46
81
84
33
39
58
72
37
40
63
74
39
83
37
61
186
64
35
72
46
62
58
54
31
33
82
38
101
30
60
27
43
113
93
111
49
72
75
41
51
69
120
37
43
171
46
48
32
32
83
46
45
62
43
36
54
51
81
109
32
42
35
50
31
27
49
94
33
64
39
39
59
35
29
36
43
32
35
88
35
78
122
48
60
51
55
94
27
45
44
49
37
45
49
32
59
51
60
48
49
26
50
48
63
126
91
50
57
51
44
64
20
41
73
104
39
57
39
48
67
48
46
111
43
36
27
33
38
47
99
70
66
106
35
31
50
38
41
65
65
52
39
49
49
29
32
30
43
31
35
71
34
60
85
34
77
54
52
62
63
86
26
66
114
60
76
58
111
45
56
59
70
55
147
111
74
61
147
127
51
33
47
40
31
95
36
57
38
101
48
97
65
47
111
75
47
46
49
79
72
40
43
163
111
39
66
105
30
54
45
119
35
32
102
38
31
35
37
135
97
30
28
73
29
34
33
62
31
32
89
101
29
69
42
34
42
140
30
116
36
38
130
88
175
43
62
57
28
46
65
70
44
74
54
44
50
72
47
65
70
41
47
65
105
63
64
34
33
121
38
68
30
41
57
42
32
63
144
207
39
35
30
34
32
89
85
32
31
43
70
41
61
64
60
45
42
76
34
31
108
36
44
111
67
49
36
29
40
88
43
40
38
90
49
95
29
42
92
41
134
92
86
33
34
28
33
39
86
28
93
37
45
166
112
34
108
37
94
93
48
42
42
125
56
23
70
95
121
38
89
28
37
52
24
53
38
64
63
83
37
54
38
50
105
38
36
36
36
36
49
47
58
88
41
109
49
53
39
36
61
68
58
55
35
40
47
99
33
151
52
41
73
42
67
38
60
37
36
63
34
65
57
51
113
39
53
73
93
56
42
30
30
30
30
31
38
30
93
55
30
38
77
57
99
74
48
42
33
42
52
83
60
61
45
43
112
39
113
149
143
66
64
119
114
102
145
59
169
35
44
70
40
38
52
43
92
69
42
67
48
119
48
84
41
68
86
88
84
44
38
32
72
152
36
166
57
48
47
70
97
57
25
126
52
37
172
126
35
42
27
33
89
42
39
34
42
29
35
58
35
57
35
41
47
63
54
72
42
40
49
61
48
44
52
60
36
58
65
75
54
44
32
70
38
66
67
44
59
64
41
57
37
32
41
81
43
40
60
62
136
37
49
47
44
48
78
64
49
70
62
45
65
81
45
39
64
46
64
33
39
58
83
182
58
38
52
78
45
91
126
52
35
39
71
43
107
52
39
52
62
39
30
70
28
77
57
50
61
55
78
63
39
67
49
56
33
45
78
36
45
47
27
111
32
70
85
60
111
48
63
35
46
33
44
85
48
98
57
46
84
89
48
34
42
102
73
32
37
117
39
67
40
42
83
45
52
134
41
44
46
139
76
92
41
101
30
30
30
30
29
84
52
275
73
51
30
63
86
54
44
66
53
69
40
186
111
52
115
71
126
48
53
36
84
41
190
66
70
42
41
44
68
95
66
112
46
39
58
87
64
85
46
90
40
96
47
53
32
29
90
53
38
67
76
43
59
46
105
46
56
54
49
78
34
53
46
78
238
174
74
72
39
91
77
35
55
42
225
176
54
66
44
64
39
77
66
68
48
61
84
63
40
261
84
245
69
48
51
97
48
49
32
48
45
51
80
46
79
39
56
46
49
85
33
74
71
46
33
78
83
105
58
52
79
30
253
80
80
150
37
188
59
233
58
82
59
52
73
40
66
71
113
50
185
51
52
161
81
90
57
57
34
40
42
43
49
77
39
57
71
66
60
45
44
29
46
46
41
59
40
49
53
24
61
56
35
37
77
84
137
55
52
51
47
47
60
67
32
71
30
83
79
81
34
35
45
51
34
25
26
36
55
80
47
53
23
40
49
39
211
178
70
43
35
71
72
37
62
39
44
32
143
55
32
57
166
77
41
73
45
51
69
53
88
39
80
47
97
36
51
63
57
125
59
70
132
56
70
25
60
54
59
60
99
51
45
104
44
128
62
81
55
122
61
65
104
52
37
84
61
92
51
74
32
185
61
32
66
71
80
90
38
44
44
82
57
77
48
71
46
33
65
77
57
60
40
104
108
92
94
69
79
58
81
35
64
75
81
49
86
26
97
125
51
53
85
55
39
73
60
67
66
65
60
50
67
54
31
56
50
58
67
50
154
31
30
30
31
30
59
30
47
30
40
71
39
33
61
56
92
69
58
310
47
[truncated: 25,245 more rows]

## Sheet: first root results of dataset1
Feature	value	z score	probability of do value	probability of not do value	probability difference	p value	support
psd	Acetaminophen	153.916	0.83831	0.326136	0.512174	0	4990
outcome	Death	119.33	0.678303	0.297816	0.380487	0	11311
outcome	LifeThreatening	43.7646	0.588833	0.405012	0.183821	0	5488
age	18-39	36.0075	0.544736	0.353987	0.190749	0	5350
indication	SUICIDE ATTEMPT	34.2306	0.869107	0.348894	0.520214	0	170
psd	Sevoflurane	27.1103	0.844694	0.394362	0.450332	0	121
indication	HEPATIC NEOPLASM MALIGNANT	24.9836	0.618698	0.349597	0.269101	0	271
age	younger than 18	21.3382	0.574043	0.376829	0.197214	0	1687
psd	Sorafenib Tosylate	20.8579	0.636015	0.393467	0.242548	0	360
gender	Female	17.0693	0.412383	0.352557	0.0598258	0	17843
dose	PO	16.9905	0.63689	0.357506	0.279385	0	457
indication	HEADACHE	13.638	0.66799	0.350904	0.317085	0	139
indication	PYREXIA	13.2915	0.594989	0.349599	0.245391	0	297
psd	Heparin Sodium	12.8527	0.700154	0.394557	0.305598	0	155
psd	Ibuprofen	12.3332	0.499919	0.392849	0.10707	0	1027
psd	Rosiglitazone Maleate	10.9548	0.503645	0.395385	0.10826	0	157
indication	BACK PAIN	9.37779	0.475643	0.35082	0.124823	0	368
psd	Bromfenac Sodium	9.24415	0.483097	0.395538	0.0875587	0	130
dose	larger than 100 MG	8.93082	0.391539	0.348952	0.0425874	0	6919
outcome	RequiredIntervention	8.09142	0.518212	0.434911	0.083301	3.33067e-16	1078
indication	MULTIPLE MYELOMA	7.29336	0.538819	0.351458	0.187361	1.51212e-13	170
indication	ATRIAL FIBRILLATION	7.01725	0.490182	0.351367	0.138815	1.13143e-12	244
psd	Moxifloxacin Hydrochloride	6.85898	0.584146	0.395277	0.18887	3.46767e-12	111
indication	BREAST CANCER METASTATIC	6.31691	0.547104	0.351465	0.195638	1.33423e-10	162
psd	Tacrolimus	6.31281	0.553567	0.395292	0.158276	1.37011e-10	129
psd	Duloxetine Hydrochloride	4.6293	0.483216	0.395242	0.0879743	1.83452e-06	253
psd	Ciprofloxacin Hydrochloride	4.53749	0.518502	0.395328	0.123174	2.84642e-06	155
dose	ORAL	4.52514	0.421478	0.362137	0.0593407	3.0178e-06	628
psd	Amiodarone Hydrochloride	4.36616	0.488909	0.395372	0.0935372	6.3226e-06	187
indication	PULMONARY HYPERTENSION	4.12933	0.451625	0.352416	0.0992085	1.81912e-05	108
indication	PLASMA CELL MYELOMA	3.98973	0.437101	0.352229	0.0848728	3.3074e-05	175
indication	MULTIPLE SCLEROSIS	3.63582	0.410055	0.351994	0.058061	0.00013855	345
psd	Azithromycin	3.13985	0.47998	0.395533	0.0844468	0.000845184	137
psd	Morphine Sulfate	3.07956	0.430183	0.395713	0.0344696	0.00103653	144
psd	Bevacizumab	3.00763	0.475733	0.395503	0.0802303	0.00131645	158
psd	Recombinant	2.63077	0.441876	0.395577	0.046299	0.00425961	215
indication	PNEUMONIA	2.22562	0.423904	0.352549	0.0713544	0.0130198	109
psd	Trovafloxacin Mesylate	2.12163	0.437481	0.395634	0.0418471	0.0169344	188
psd	Capecitabine	1.90545	0.452913	0.395672	0.0572409	0.0283609	113
psd	Olanzapine	1.67283	0.453517	0.395678	0.0578389	0.0471805	108
psd	Interferon Alfa-2b	1.66199	0.439688	0.395723	0.0439652	0.0482578	105
psd	Peginterferon Alfa-2a	1.6587	0.441554	0.39571	0.0458442	0.0485877	111

## Sheet: second root results of dataset1
Feature	value	z score	probability of do value	probability of not do value	probability difference	p value	support
psd	Acetaminophen	164.922	0.860545	0.332107	0.528438	0	4990
outcome	Death	101.792	0.68002	0.31137	0.36865	0	11311
outcome	LifeThreatening	40.8005	0.607871	0.412071	0.1958	0	5488
age	18-39	37.1115	0.565664	0.35707	0.208593	0	5350
indication	SUICIDE ATTEMPT	27.5285	0.863338	0.361332	0.502007	0	170
age	younger than 18	21.2882	0.590284	0.382489	0.207795	0	1687
indication	HEPATIC NEOPLASM MALIGNANT	19.2779	0.544686	0.362967	0.181719	0	271
psd	Sevoflurane	18.7311	0.79468	0.40274	0.39194	0	121
psd	Sorafenib Tosylate	17.143	0.61091	0.401982	0.208927	0	360
dose	PO	16.4539	0.64716	0.361599	0.285561	0	457
psd	Bromfenac Sodium	15.8324	0.495985	0.403707	0.0922784	0	130
gender	Female	15.4587	0.420088	0.361633	0.0584549	0	17843
indication	PYREXIA	15.4174	0.644408	0.36139	0.283018	0	297
indication	HEADACHE	14.0369	0.695179	0.363107	0.332072	0	139
indication	ATRIAL FIBRILLATION	10.3044	0.569693	0.362913	0.20678	0	244
psd	Heparin Sodium	9.77147	0.651357	0.402984	0.248373	0	155
psd	Ibuprofen	9.47505	0.489911	0.401559	0.0883524	0	1027
psd	Rosiglitazone Maleate	8.40373	0.511889	0.40357	0.108319	0	157
dose	larger than 100 MG	8.19379	0.395576	0.3533	0.0422754	1.11022e-16	6919
psd	Tacrolimus	7.70615	0.564855	0.403466	0.161389	6.43929e-15	129
indication	BREAST CANCER METASTATIC	7.18361	0.583095	0.363588	0.219508	3.39506e-13	162
outcome	RequiredIntervention	7.05076	0.522225	0.444298	0.0779274	8.89733e-13	1078
indication	MULTIPLE MYELOMA	6.52011	0.556382	0.363715	0.192667	3.51269e-11	170
psd	Moxifloxacin Hydrochloride	6.10268	0.572751	0.403522	0.169229	5.21533e-10	111
indication	BACK PAIN	5.82925	0.450089	0.363759	0.0863299	2.78387e-09	368
psd	Trovafloxacin Mesylate	4.77168	0.502973	0.403524	0.0994492	9.13464e-07	188
psd	Amiodarone Hydrochloride	4.75551	0.515014	0.403465	0.111549	9.89746e-07	187
indication	PLASMA CELL MYELOMA	4.71886	0.461421	0.36443	0.0969911	1.18587e-06	175
psd	Ciprofloxacin Hydrochloride	4.48877	0.524748	0.403521	0.121226	3.58181e-06	155
psd	Buprenorphine Hydrochloride	4.47646	0.475144	0.40373	0.0714136	3.79461e-06	156
dose	ORAL	3.90129	0.422079	0.366496	0.0555826	4.78403e-05	628
psd	Azithromycin	3.73067	0.512018	0.403629	0.108389	9.54851e-05	137
psd	Capecitabine	3.62535	0.537173	0.403622	0.133551	0.000144286	113
psd	Peginterferon Alfa-2a	3.53588	0.513143	0.403703	0.10944	0.000203212	111
indication	PNEUMONIA	3.09648	0.472364	0.364667	0.107697	0.000979174	109
indication	METASTATIC RENAL CELL CARCINOMA	2.94835	0.463169	0.364646	0.0985238	0.00159738	124
psd	Ribavirin	2.91021	0.494366	0.40367	0.0906959	0.00180593	147
indication	HEPATITIS C	2.85804	0.404087	0.364253	0.0398341	0.00213134	524
psd	Duloxetine Hydrochloride	2.72275	0.463641	0.40362	0.0600212	0.00323704	253
psd	Bevacizumab	2.39351	0.465727	0.403767	0.0619601	0.00834409	158
psd	Paclitaxel	2.21172	0.480352	0.4038	0.0765517	0.013493	112
indication	EPILEPSY	2.12097	0.43883	0.3648	0.07403	0.016962	119
psd	Peginterferon Alfa-2b	2.023	0.46324	0.403831	0.059409	0.0215368	125
indication	PROSTATE CANCER	1.94351	0.42311	0.364909	0.0582007	0.0259772	110
psd	Quetiapine Fumarate	1.81557	0.453707	0.403852	0.0498549	0.034718	134
psd	Olanzapine	1.68649	0.464834	0.403854	0.0609796	0.0458506	108

## Sheet: third root results of dataset 1
Feature	value	z score	probability of do value	probability of not do value	probability difference	p value	support
psd	Acetaminophen	173.073	0.867826	0.346765	0.521061	0	4990
outcome	Death	101.277	0.689063	0.329276	0.359786	0	11311
age	18-39	36.7421	0.578998	0.374113	0.204885	0	5350
outcome	LifeThreatening	36.4221	0.604668	0.430595	0.174074	0	5488
indication	HEPATIC NEOPLASM MALIGNANT	27.9291	0.565486	0.378326	0.18716	0	271
age	younger than 18	19.8574	0.590547	0.399831	0.190716	0	1687
indication	SUICIDE ATTEMPT	19.5942	0.770122	0.377601	0.392521	0	170
psd	Bromfenac Sodium	19.5334	0.562276	0.417173	0.145103	0	130
psd	Sorafenib Tosylate	18.6419	0.617234	0.415709	0.201525	0	360
dose	PO	18.0802	0.670772	0.375469	0.295303	0	457
gender	Female	16.9014	0.436884	0.373431	0.0634529	0	17843
psd	Sevoflurane	15.4582	0.78262	0.416479	0.366141	0	121
indication	HEADACHE	14.5817	0.68934	0.378668	0.310672	0	139
indication	PYREXIA	13.3905	0.630028	0.377222	0.252806	0	297
indication	BACK PAIN	9.6516	0.522558	0.378218	0.14434	0	368
indication	ATRIAL FIBRILLATION	8.93043	0.557187	0.378651	0.178536	0	244
psd	Heparin Sodium	8.91802	0.62724	0.416798	0.210442	0	155
psd	Ibuprofen	8.55646	0.495085	0.415457	0.0796282	0	1027
indication	BREAST CANCER METASTATIC	8.5372	0.612068	0.378913	0.233155	0	162
dose	larger than 100 MG	8.34318	0.409837	0.367309	0.0425281	0	6919
psd	Bevacizumab	7.88409	0.570794	0.417025	0.153769	1.55431e-15	158
psd	Tacrolimus	7.48363	0.567611	0.417158	0.150452	3.61933e-14	129
indication	MULTIPLE MYELOMA	7.09563	0.590008	0.378999	0.211009	6.43818e-13	170
outcome	RequiredIntervention	6.77689	0.534193	0.459039	0.075154	6.13931e-12	1078
psd	Moxifloxacin Hydrochloride	6.43309	0.591521	0.41716	0.174362	6.25174e-11	111
psd	Ribavirin	6.247	0.602328	0.416944	0.185384	2.09206e-10	147
psd	Trovafloxacin Mesylate	5.977	0.559538	0.416956	0.142582	1.13641e-09	188
psd	Amiodarone Hydrochloride	5.25062	0.525029	0.417137	0.107892	7.57945e-08	187
psd	Peginterferon Alfa-2a	5.17447	0.559184	0.417258	0.141926	1.14278e-07	111
psd	Ciprofloxacin Hydrochloride	5.1339	0.556038	0.4171	0.138937	1.41903e-07	155
indication	MULTIPLE SCLEROSIS	4.9644	0.464392	0.379295	0.0850975	3.44576e-07	345
psd	Rofecoxib	4.61023	0.471224	0.416929	0.0542947	2.01112e-06	512
dose	ORAL	4.03963	0.435642	0.380612	0.0550294	2.67674e-05	628
indication	PLASMA CELL MYELOMA	3.99916	0.469455	0.379915	0.0895399	3.1784e-05	175
indication	HEPATITIS C	3.92204	0.435188	0.379298	0.0558897	4.39019e-05	524
psd	Duloxetine Hydrochloride	3.40571	0.492136	0.41717	0.0749656	0.000329956	253
psd	Capecitabine	3.27025	0.522744	0.417363	0.105381	0.000537266	113
indication	COLORECTAL CANCER	2.98081	0.479175	0.380136	0.0990396	0.00143743	109
psd	Buprenorphine Hydrochloride	2.92411	0.469384	0.417467	0.051917	0.00172723	156
psd	Peginterferon Alfa-2b	2.88883	0.501569	0.417401	0.0841683	0.00193338	125
psd	Interferon Alfa-2b	2.73099	0.505394	0.417436	0.0879584	0.00315718	105
psd	Recombinant	2.7165	0.470707	0.417375	0.0533324	0.0032988	215
indication	Chronic hepatitis C	2.6861	0.436759	0.380034	0.0567254	0.00361452	230
psd	Infliximab	2.53856	0.47887	0.417316	0.0615536	0.00556554	221
indication	OSTEOARTHRITIS	2.38172	0.464886	0.380226	0.0846602	0.00861607	104
psd	Sofosbuvir	2.31339	0.468574	0.417485	0.0510888	0.0103505	145
indication	EPILEPSY	2.11092	0.453841	0.380228	0.0736133	0.0173895	119
psd	Simvastatin	2.07526	0.462555	0.417302	0.0452529	0.0189811	312
psd	Quetiapine Fumarate	1.89956	0.475828	0.417474	0.0583539	0.0287452	134
psd	Olanzapine	1.86525	0.482571	0.417496	0.0650748	0.031073	108

## Sheet: first causal tree of dataset 1
level	route	Feature	value	z score	probability of do value	probability of not do value	probability difference	p value	support
0		psd	Acetaminophen	153.916	0.83831	0.326136	0.512174	0	4990
0		outcome	Death	119.33	0.678303	0.297816	0.380487	0	11311
0		outcome	LifeThreatening	43.7646	0.588833	0.405012	0.183821	0	5488
0		age	18-39	36.0075	0.544736	0.353987	0.190749	0	5350
0		indication	SUICIDE ATTEMPT	34.2306	0.869107	0.348894	0.520214	0	170
0		psd	Sevoflurane	27.1103	0.844694	0.394362	0.450332	0	121
0		indication	HEPATIC NEOPLASM MALIGNANT	24.9836	0.618698	0.349597	0.269101	0	271
0		age	younger than 18	21.3382	0.574043	0.376829	0.197214	0	1687
0		psd	Sorafenib Tosylate	20.8579	0.636015	0.393467	0.242548	0	360
0		dose	PO	16.9905	0.63689	0.357506	0.279385	0	457
0		indication	HEADACHE	13.638	0.66799	0.350904	0.317085	0	139
0		indication	PYREXIA	13.2915	0.594989	0.349599	0.245391	0	297
0		psd	Heparin Sodium	12.8527	0.700154	0.394557	0.305598	0	155
0		psd	Rosiglitazone Maleate	10.9548	0.503645	0.395385	0.10826	0	157
0		outcome	RequiredIntervention	8.09142	0.518212	0.434911	0.083301	3.33067e-16	1078
0		indication	MULTIPLE MYELOMA	7.29336	0.538819	0.351458	0.187361	1.51212e-13	170
0		psd	Moxifloxacin Hydrochloride	6.85898	0.584146	0.395277	0.18887	3.46767e-12	111
0		indication	BREAST CANCER METASTATIC	6.31691	0.547104	0.351465	0.195638	1.33423e-10	162
0		psd	Tacrolimus	6.31281	0.553567	0.395292	0.158276	1.37011e-10	129
0		psd	Ciprofloxacin Hydrochloride	4.53749	0.518502	0.395328	0.123174	2.84642e-06	155
1	Acetaminophen	outcome	Death	41.2886	0.961339	0.785276	0.176063	0	1889
1	Acetaminophen	indication	SUICIDE ATTEMPT	21.9791	0.939442	0.703776	0.235666	0	107
1	Acetaminophen	age	18-39	14.6152	0.881268	0.782747	0.0985202	0	1560
1	Acetaminophen	gender	Female	13.8989	0.860262	0.759335	0.100927	0	2571
1	Acetaminophen	outcome	LifeThreatening	11.7654	0.90862	0.853855	0.054765	0	652
1	Acetaminophen	dose	PO	11.5222	0.900886	0.764453	0.136433	0	227
1	Acetaminophen	age	younger than 18	8.03173	0.879159	0.816163	0.0629964	4.44089e-16	580
1	18-39	psd	Acetaminophen	74.2553	0.881373	0.404916	0.476458	0	1570
1	18-39	outcome	Death	41.526	0.81932	0.472934	0.346386	0	1591
1	18-39	dose	PO	14.1821	0.82217	0.469269	0.352902	0	115
1	18-39	gender	Female	8.99414	0.578623	0.489832	0.0887907	0	3220
1	18-39	outcome	LifeThreatening	7.95558	0.65837	0.570562	0.0878073	8.88178e-16	1045
1	18-39	psd	Ibuprofen	4.48267	0.610465	0.54079	0.0696752	3.68574e-06	303
1	18-39	outcome	RequiredIntervention	4.06834	0.659462	0.585305	0.0741576	2.36743e-05	302
1	18-39	dose	ORAL	2.51634	0.557092	0.481144	0.0759479	0.0059291	138
1	18-39	indication	MULTIPLE SCLEROSIS	2.22194	0.524895	0.45874	0.0661552	0.0131435	105
1	younger than 18	psd	Acetaminophen	37.57	0.879275	0.412433	0.466842	0	584
1	younger than 18	outcome	Death	17.6804	0.824459	0.534838	0.289621	0	400
1	younger than 18	indication	PYREXIA	7.79973	0.675634	0.454854	0.22078	3.10862e-15	135
1	younger than 18	outcome	LifeThreatening	5.23789	0.686916	0.58925	0.097666	8.12102e-08	375
1	younger than 18	gender	Female	4.72947	0.583174	0.495563	0.0876108	1.12555e-06	845
1	Sorafenib Tosylate	age	40-64	2.29735	0.664749	0.613011	0.0517378	0.0107993	173
1	PO	psd	Acetaminophen	26.3597	0.91729	0.368253	0.549037	0	172
1	PO	outcome	Death	14.1185	0.832315	0.407451	0.424863	0	197
1	PO	gender	Female	3.16468	0.656845	0.537861	0.118984	0.000776265	191
1	PYREXIA	psd	Acetaminophen	6.7114	0.726279	0.495021	0.231258	9.63796e-12	122
1	PYREXIA	age	younger than 18	3.49981	0.686766	0.545547	0.141219	0.000232792	120
1	PYREXIA	gender	Female	3.34197	0.660316	0.525852	0.134463	0.000415936	124
2	Acetaminophen->18-39	outcome	Death	28.7128	0.96649	0.838275	0.128215	0	641
2	Acetaminophen->18-39	gender	Female	10.6213	0.909062	0.820135	0.0889265	0	1041
2	Acetaminophen->18-39	outcome	LifeThreatening	3.06407	0.913048	0.890619	0.0224288	0.00109175	222
2	Acetaminophen->Female	outcome	Death	27.1236	0.968218	0.817751	0.150467	0	1011
2	Acetaminophen->Female	age	18-39	12.1721	0.909062	0.809068	0.0999937	0	1041
2	Acetaminophen->Female	outcome	LifeThreatening	8.80408	0.926898	0.875729	0.0511687	0	351
2	Acetaminophen->Female	dose	PO	6.26045	0.907128	0.801464	0.105664	1.91934e-10	133
2	Acetaminophen->Female	age	younger than 18	4.7632	0.898595	0.851377	0.0472182	9.52757e-07	270
2	Acetaminophen->younger than 18	outcome	Death	12.7795	0.965376	0.858366	0.10701	0	145
2	Acetaminophen->younger than 18	gender	Female	6.14782	0.898595	0.796783	0.101812	3.92785e-10	270
2	Acetaminophen->younger than 18	outcome	LifeThreatening	3.14985	0.917375	0.88003	0.0373453	0.000816775	115
2	18-39->Acetaminophen	outcome	Death	28.7128	0.96649	0.838275	0.128215	0	641
2	18-39->Acetaminophen	gender	Female	10.6213	0.909062	0.820135	0.0889265	0	1041
2	18-39->Acetaminophen	outcome	LifeThreatening	3.06407	0.913048	0.890619	0.0224288	0.00109175	222
2	18-39->Female	psd	Acetaminophen	59.8586	0.909193	0.419347	0.489846	0	1047
2	18-39->Female	outcome	Death	31.4293	0.854065	0.520676	0.333389	0	931
2	18-39->Female	outcome	LifeThreatening	11.4156	0.751759	0.600534	0.151225	0	567
2	18-39->Female	psd	Ibuprofen	2.90406	0.635874	0.575531	0.060343	0.00184181	165
2	18-39->Female	outcome	RequiredIntervention	2.24915	0.681784	0.627648	0.0541356	0.0122514	175
2	18-39->Ibuprofen	gender	Female	2.03786	0.635874	0.575822	0.0600516	0.0207822	165
2	younger than 18->Acetaminophen	outcome	Death	12.7795	0.965376	0.858366	0.10701	0	145
2	younger than 18->Acetaminophen	gender	Female	6.14782	0.898595	0.796783	0.101812	3.92785e-10	270
2	younger than 18->Acetaminophen	outcome	LifeThreatening	3.14985	0.917375	0.88003	0.0373453	0.000816775	115
2	younger than 18->Female	psd	Acetaminophen	26.4683	0.898942	0.432466	0.466476	0	273
2	younger than 18->Female	outcome	Death	16.4285	0.88588	0.539711	0.346168	0	188
2	younger than 18->Female	outcome	LifeThreatening	4.28019	0.716286	0.596961	0.119325	9.33658e-06	187
2	younger than 18->Female	dose	larger than 100 MG	2.10924	0.58674	0.508476	0.0782639	0.0174618	166

## Sheet: second causal tree of dataset 1
level	route	Feature	value	z score	probability of do value	probability of not do value	probability difference	p value	support
0		psd	Acetaminophen	164.922	0.860545	0.332107	0.528438	0	4990
0		outcome	Death	101.792	0.68002	0.31137	0.36865	0	11311
0		outcome	LifeThreatening	40.8005	0.607871	0.412071	0.1958	0	5488
0		age	18-39	37.1115	0.565664	0.35707	0.208593	0	5350
0		indication	SUICIDE ATTEMPT	27.5285	0.863338	0.361332	0.502007	0	170
0		age	younger than 18	21.2882	0.590284	0.382489	0.207795	0	1687
0		indication	HEPATIC NEOPLASM MALIGNANT	19.2779	0.544686	0.362967	0.181719	0	271
0		psd	Sevoflurane	18.7311	0.79468	0.40274	0.39194	0	121
0		psd	Sorafenib Tosylate	17.143	0.61091	0.401982	0.208927	0	360
0		dose	PO	16.4539	0.64716	0.361599	0.285561	0	457
0		indication	PYREXIA	15.4174	0.644408	0.36139	0.283018	0	297
0		indication	HEADACHE	14.0369	0.695179	0.363107	0.332072	0	139
0		indication	ATRIAL FIBRILLATION	10.3044	0.569693	0.362913	0.20678	0	244
0		psd	Heparin Sodium	9.77147	0.651357	0.402984	0.248373	0	155
0		psd	Rosiglitazone Maleate	8.40373	0.511889	0.40357	0.108319	0	157
0		psd	Tacrolimus	7.70615	0.564855	0.403466	0.161389	6.43929e-15	129
0		indication	BREAST CANCER METASTATIC	7.18361	0.583095	0.363588	0.219508	3.39506e-13	162
0		outcome	RequiredIntervention	7.05076	0.522225	0.444298	0.0779274	8.89733e-13	1078
0		indication	MULTIPLE MYELOMA	6.52011	0.556382	0.363715	0.192667	3.51269e-11	170
0		psd	Moxifloxacin Hydrochloride	6.10268	0.572751	0.403522	0.169229	5.21533e-10	111
0		psd	Trovafloxacin Mesylate	4.77168	0.502973	0.403524	0.0994492	9.13464e-07	188
0		psd	Amiodarone Hydrochloride	4.75551	0.515014	0.403465	0.111549	9.89746e-07	187
0		psd	Ciprofloxacin Hydrochloride	4.48877	0.524748	0.403521	0.121226	3.58181e-06	155
0		psd	Azithromycin	3.73067	0.512018	0.403629	0.108389	9.54851e-05	137
0		psd	Capecitabine	3.62535	0.537173	0.403622	0.133551	0.000144286	113
0		psd	Peginterferon Alfa-2a	3.53588	0.513143	0.403703	0.10944	0.000203212	111
1	Acetaminophen	outcome	Death	33.7781	0.959301	0.823239	0.136061	0	1889
1	Acetaminophen	indication	SUICIDE ATTEMPT	17.6369	0.938547	0.74568	0.192868	0	107
1	Acetaminophen	age	18-39	15.687	0.906755	0.811338	0.0954175	0	1560
1	Acetaminophen	gender	Female	13.4148	0.881436	0.793331	0.0881053	0	2571
1	Acetaminophen	outcome	LifeThreatening	13.1188	0.930799	0.874066	0.0567333	0	652
1	Acetaminophen	dose	PO	10.507	0.916669	0.795916	0.120754	0	227
1	Acetaminophen	age	younger than 18	8.00971	0.900058	0.844623	0.055435	5.55112e-16	580
1	Acetaminophen	indication	PYREXIA	3.11898	0.817595	0.755546	0.0620491	0.000907397	130
1	18-39	psd	Acetaminophen	72.6249	0.906852	0.423953	0.482899	0	1570
1	18-39	outcome	Death	35.4724	0.827481	0.503301	0.324179	0	1591
1	18-39	dose	PO	13.7188	0.838647	0.487577	0.351071	0	115
1	18-39	outcome	LifeThreatening	8.44395	0.691992	0.590347	0.101645	0	1045
1	18-39	gender	Female	8.0719	0.598156	0.51361	0.0845465	3.33067e-16	3220
1	18-39	psd	Ibuprofen	4.19645	0.631306	0.561723	0.0695835	1.35564e-05	303
1	18-39	outcome	RequiredIntervention	4.08394	0.686356	0.607886	0.0784702	2.21394e-05	302
1	18-39	dose	ORAL	1.94996	0.563234	0.500064	0.0631696	0.0255904	138
1	younger than 18	psd	Acetaminophen	36.786	0.900402	0.426088	0.474314	0	584
1	younger than 18	outcome	Death	17.4036	0.847383	0.545695	0.301688	0	400
1	younger than 18	indication	PYREXIA	8.67874	0.717805	0.473282	0.244522	0	135
1	younger than 18	outcome	LifeThreatening	4.39134	0.695596	0.605327	0.0902684	5.63284e-06	375
1	younger than 18	gender	Female	4.31928	0.599892	0.514841	0.085051	7.82706e-06	845
1	Sorafenib Tosylate	age	40-64	2.85531	0.647436	0.579805	0.0676312	0.00214977	173
1	PO	psd	Acetaminophen	24.6418	0.933448	0.372385	0.561064	0	172
1	PO	outcome	Death	12.521	0.837833	0.42179	0.416043	0	197
1	PO	gender	Female	3.41889	0.671876	0.536256	0.13562	0.000314381	191
1	PYREXIA	psd	Acetaminophen	8.84812	0.809259	0.526957	0.282302	0	122
1	PYREXIA	gender	Female	3.92785	0.718265	0.564782	0.153483	4.28544e-05	124
1	PYREXIA	age	younger than 18	3.47589	0.731629	0.593759	0.13787	0.000254578	120
1	ATRIAL FIBRILLATION	gender	Female	2.11657	0.608608	0.522079	0.0865299	0.0171481	104
2	Acetaminophen->18-39	outcome	Death	22.5882	0.969391	0.879168	0.0902225	0	641
2	Acetaminophen->18-39	gender	Female	11.2131	0.932656	0.849929	0.0827272	0	1041
2	Acetaminophen->18-39	outcome	LifeThreatening	5.26081	0.943684	0.913893	0.0297911	7.17108e-08	222
2	Acetaminophen->Female	outcome	Death	21.9789	0.96683	0.854148	0.112682	0	1011
2	Acetaminophen->Female	age	18-39	13.4013	0.932656	0.834312	0.0983438	0	1041
2	Acetaminophen->Female	outcome	LifeThreatening	10.0021	0.947673	0.895459	0.0522144	0	351
2	Acetaminophen->Female	age	younger than 18	5.65247	0.924425	0.875628	0.0487967	7.9081e-09	270
2	Acetaminophen->Female	dose	PO	5.57459	0.924542	0.833055	0.0914867	1.24056e-08	133
2	Acetaminophen->younger than 18	outcome	Death	10.8291	0.964887	0.879876	0.0850108	0	145
2	Acetaminophen->younger than 18	gender	Female	7.75783	0.924425	0.815441	0.108984	4.32987e-15	270
2	Acetaminophen->younger than 18	outcome	LifeThreatening	3.15799	0.932368	0.895484	0.036884	0.000794302	115
2	18-39->Acetaminophen	outcome	Death	22.5882	0.969391	0.879168	0.0902225	0	641
2	18-39->Acetaminophen	gender	Female	11.2131	0.932656	0.849929	0.0827272	0	1041
2	18-39->Acetaminophen	outcome	LifeThreatening	5.26081	0.943684	0.913893	0.0297911	7.17108e-08	222
2	18-39->Female	psd	Acetaminophen	57.3866	0.932747	0.436943	0.495805	0	1047
2	18-39->Female	outcome	Death	27.5325	0.864824	0.549007	0.315817	0	931
2	18-39->Female	outcome	LifeThreatening	12.0631	0.791713	0.618647	0.173066	0	567
2	18-39->Female	psd	Ibuprofen	2.70168	0.655525	0.595058	0.0604668	0.00344948	165
2	18-39->Female	outcome	RequiredIntervention	2.68854	0.718034	0.649252	0.0687827	0.00358825	175
2	18-39->Female	dose	larger than 100 MG	1.77046	0.550633	0.514594	0.0360393	0.0383255	608
2	18-39->Ibuprofen	gender	Female	1.78688	0.655525	0.599205	0.0563198	0.0369788	165
2	younger than 18->Acetaminophen	outcome	Death	10.8291	0.964887	0.879876	0.0850108	0	145
2	younger than 18->Acetaminophen	gender	Female	7.75783	0.924425	0.815441	0.108984	4.32987e-15	270
2	younger than 18->Acetaminophen	outcome	LifeThreatening	3.15799	0.932368	0.895484	0.036884	0.000794302	115
2	younger than 18->Female	psd	Acetaminophen	26.2849	0.9249	0.444775	0.480125	0	273
2	younger than 18->Female	outcome	Death	16.6945	0.915424	0.553034	0.362389	0	188
2	younger than 18->Female	outcome	LifeThreatening	4.13381	0.738152	0.612877	0.125275	1.784e-05	187
2	younger than 18->Female	dose	larger than 100 MG	2.29576	0.619732	0.529715	0.0900174	0.0108447	166

## Sheet: third causal tree of dataset 1
level	route	Feature	value	z score	probability of do value	probability of not do value	probability difference	p value	support
0		psd	Acetaminophen	173.073	0.867826	0.346765	0.521061	0	4990
0		outcome	Death	101.277	0.689063	0.329276	0.359786	0	11311
0		age	18-39	36.7421	0.578998	0.374113	0.204885	0	5350
0		outcome	LifeThreatening	36.4221	0.604668	0.430595	0.174074	0	5488
0		indication	HEPATIC NEOPLASM MALIGNANT	27.9291	0.565486	0.378326	0.18716	0	271
0		age	younger than 18	19.8574	0.590547	0.399831	0.190716	0	1687
0		indication	SUICIDE ATTEMPT	19.5942	0.770122	0.377601	0.392521	0	170
0		psd	Bromfenac Sodium	19.5334	0.562276	0.417173	0.145103	0	130
0		psd	Sorafenib Tosylate	18.6419	0.617234	0.415709	0.201525	0	360
0		dose	PO	18.0802	0.670772	0.375469	0.295303	0	457
0		psd	Sevoflurane	15.4582	0.78262	0.416479	0.366141	0	121
0		indication	HEADACHE	14.5817	0.68934	0.378668	0.310672	0	139
0		indication	PYREXIA	13.3905	0.630028	0.377222	0.252806	0	297
0		indication	BACK PAIN	9.6516	0.522558	0.378218	0.14434	0	368
0		indication	ATRIAL FIBRILLATION	8.93043	0.557187	0.378651	0.178536	0	244
0		psd	Heparin Sodium	8.91802	0.62724	0.416798	0.210442	0	155
0		indication	BREAST CANCER METASTATIC	8.5372	0.612068	0.378913	0.233155	0	162
0		psd	Bevacizumab	7.88409	0.570794	0.417025	0.153769	1.55431e-15	158
0		psd	Tacrolimus	7.48363	0.567611	0.417158	0.150452	3.61933e-14	129
0		indication	MULTIPLE MYELOMA	7.09563	0.590008	0.378999	0.211009	6.43818e-13	170
0		outcome	RequiredIntervention	6.77689	0.534193	0.459039	0.075154	6.13931e-12	1078
0		psd	Moxifloxacin Hydrochloride	6.43309	0.591521	0.41716	0.174362	6.25174e-11	111
0		psd	Ribavirin	6.247	0.602328	0.416944	0.185384	2.09206e-10	147
0		psd	Trovafloxacin Mesylate	5.977	0.559538	0.416956	0.142582	1.13641e-09	188
0		psd	Amiodarone Hydrochloride	5.25062	0.525029	0.417137	0.107892	7.57945e-08	187
0		psd	Peginterferon Alfa-2a	5.17447	0.559184	0.417258	0.141926	1.14278e-07	111
0		psd	Ciprofloxacin Hydrochloride	5.1339	0.556038	0.4171	0.138937	1.41903e-07	155
0		psd	Capecitabine	3.27025	0.522744	0.417363	0.105381	0.000537266	113
0		psd	Peginterferon Alfa-2b	2.88883	0.501569	0.417401	0.0841683	0.00193338	125
0		psd	Interferon Alfa-2b	2.73099	0.505394	0.417436	0.0879584	0.00315718	105
1	Acetaminophen	outcome	Death	32.2126	0.956598	0.844616	0.111982	0	1889
1	Acetaminophen	age	18-39	16.555	0.919599	0.82899	0.0906088	0	1560
1	Acetaminophen	gender	Female	13.2705	0.892301	0.81522	0.0770804	0	2571
1	Acetaminophen	dose	PO	12.6786	0.922377	0.809774	0.112603	0	227
1	Acetaminophen	outcome	LifeThreatening	6.71755	0.918168	0.889103	0.0290652	9.24039e-12	652
1	Acetaminophen	age	younger than 18	5.62855	0.901056	0.863014	0.0380425	9.08638e-09	580
1	Acetaminophen	indication	SUICIDE ATTEMPT	3.49863	0.83558	0.768722	0.0668584	0.000233831	107
1	Acetaminophen	indication	PYREXIA	2.2022	0.813912	0.76984	0.0440718	0.0138255	130
1	18-39	psd	Acetaminophen	74.3361	0.919845	0.437429	0.482416	0	1570
1	18-39	outcome	Death	32.5242	0.823229	0.525046	0.298183	0	1591
1	18-39	dose	PO	14.0294	0.846308	0.504612	0.341696	0	115
1	18-39	gender	Female	9.84196	0.618405	0.51641	0.101995	0	3220
1	18-39	outcome	LifeThreatening	6.4129	0.685349	0.608896	0.0764523	7.13888e-11	1045
1	18-39	outcome	RequiredIntervention	5.03568	0.714978	0.619765	0.0952129	2.38074e-07	302
1	18-39	indication	MULTIPLE SCLEROSIS	3.86741	0.628358	0.498285	0.130073	5.49981e-05	105
1	18-39	psd	Ibuprofen	2.26358	0.614365	0.576875	0.03749	0.0117999	303
1	18-39	dose	ORAL	1.73886	0.571463	0.517156	0.0543066	0.0410294	138
1	HEPATIC NEOPLASM MALIGNANT	age	40-64	4.76648	0.595638	0.538988	0.0566505	9.37359e-07	132
1	younger than 18	psd	Acetaminophen	37.6625	0.901439	0.42594	0.475499	0	584
1	younger than 18	outcome	Death	15.4441	0.828252	0.553404	0.274848	0	400
1	younger than 18	indication	PYREXIA	8.95094	0.713908	0.467663	0.246245	0	135
1	younger than 18	gender	Female	4.31952	0.599832	0.516163	0.0836696	7.81849e-06	845
1	younger than 18	outcome	LifeThreatening	2.8335	0.671832	0.614022	0.05781	0.00230204	375
1	Sorafenib Tosylate	age	40-64	5.47115	0.675673	0.565909	0.109764	2.23562e-08	173
1	PO	psd	Acetaminophen	23.6825	0.930849	0.413741	0.517109	0	172
1	PO	outcome	Death	11.9996	0.835691	0.450339	0.385352	0	197
1	PO	gender	Female	3.81137	0.69094	0.547526	0.143414	6.91e-05	191
1	PYREXIA	psd	Acetaminophen	9.24625	0.804781	0.504143	0.300638	0	122
1	PYREXIA	gender	Female	4.86404	0.719015	0.527603	0.191413	5.75061e-07	124
1	PYREXIA	age	younger than 18	3.8005	0.728454	0.577095	0.151359	7.22034e-05	120
1	BACK PAIN	age	40-64	2.29056	0.558272	0.484152	0.0741198	0.0109943	155
1	ATRIAL FIBRILLATION	gender	Female	2.23766	0.60085	0.509476	0.0913743	0.0126215	104
2	Acetaminophen->18-39	outcome	Death	16.6316	0.966405	0.905638	0.0607662	0	641
2	Acetaminophen->18-39	gender	Female	11.5401	0.942994	0.869099	0.0738949	0	1041
2	Acetaminophen->Female	outcome	Death	19.0052	0.963525	0.880957	0.0825685	0	1011
2	Acetaminophen->Female	age	18-39	13.7515	0.942994	0.85017	0.0928238	0	1041
2	Acetaminophen->Female	dose	PO	8.19322	0.937527	0.8424	0.0951263	1.11022e-16	133
2	Acetaminophen->Female	outcome	LifeThreatening	5.38348	0.940157	0.912897	0.0272606	3.65303e-08	351
2	Acetaminophen->Female	age	younger than 18	2.68968	0.916473	0.891847	0.0246262	0.00357603	270
2	Acetaminophen->younger than 18	outcome	Death	11.1581	0.965158	0.88582	0.0793376	0	145
2	Acetaminophen->younger than 18	gender	Female	5.45058	0.916473	0.839105	0.0773679	2.51023e-08	270
2	18-39->Acetaminophen	outcome	Death	16.6316	0.966405	0.905638	0.0607662	0	641
2	18-39->Acetaminophen	gender	Female	11.5401	0.942994	0.869099	0.0738949	0	1041
2	18-39->Female	psd	Acetaminophen	55.8032	0.943139	0.461941	0.481199	0	1047
2	18-39->Female	outcome	Death	24.2141	0.860971	0.581096	0.279875	0	931
2	18-39->Female	outcome	LifeThreatening	10.6061	0.793901	0.643386	0.150515	0	567
2	18-39->Female	outcome	RequiredIntervention	3.67245	0.757785	0.668148	0.0896368	0.000120116	175
2	18-39->Female	psd	Ibuprofen	1.75627	0.65628	0.61636	0.0399201	0.0395209	165
2	18-39->Ibuprofen	gender	Female	3.20513	0.65628	0.557254	0.0990254	0.000674998	165
2	younger than 18->Acetaminophen	outcome	Death	11.1581	0.965158	0.88582	0.0793376	0	145
2	younger than 18->Acetaminophen	gender	Female	5.45058	0.916473	0.839105	0.0773679	2.51023e-08	270
2	younger than 18->Female	psd	Acetaminophen	25.5596	0.917046	0.448434	0.468612	0	273
2	younger than 18->Female	outcome	Death	15.3484	0.901008	0.558452	0.342555	0	188
2	younger than 18->Female	outcome	LifeThreatening	3.02822	0.712451	0.622028	0.0904229	0.00122999	187
2	younger than 18->Female	dose	larger than 100 MG	2.08809	0.604589	0.525074	0.0795152	0.0183947	166

## Sheet: first root results of dataset 2
Feature	value	z score	probability of do value	probability of not do value	probability difference	p value	support
adversary events	Completed suicide	252.267	0.999966	0.284892	0.715074	0	2871
adversary events	Death	231.711	0.999343	0.320424	0.678919	0	1598
adversary events	Cardio-respiratory arrest	62.3929	0.92611	0.342088	0.584022	0	847
adversary events	Toxicity to various agents	51.5316	0.688592	0.300065	0.388527	0	4220
adversary events	Asphyxia	42.6162	0.968117	0.356721	0.611395	0	157
adversary events	Drug abuse	38.7692	0.739021	0.332587	0.406435	0	1854
adversary events	Cardiac arrest	33.3356	0.809421	0.346481	0.46294	0	810
adversary events	Respiratory arrest	25.863	0.785348	0.350721	0.434627	0	597
psd	Hydrocodone Bitartrate	23.6682	0.911803	0.357252	0.554551	0	147
psd	Diphenhydramine Hydrochloride	22.7134	0.907252	0.357419	0.549833	0	140
adversary events	Pulmonary oedema	20.3758	0.809269	0.355026	0.454243	0	313
adversary events	Poisoning	19.753	0.78464	0.35469	0.42995	0	352
age	40-64	18.3306	0.439257	0.321194	0.118062	0	9171
dose	ORAL	16.9152	0.489378	0.176024	0.313354	0	725
psd	Morphine Sulfate	16.174	0.740027	0.355431	0.384596	0	341
psd	Diazepam	15.6888	0.732042	0.35549	0.376552	0	344
age	18-39	15.5879	0.45448	0.339438	0.115042	0	5773
indication	SUICIDE ATTEMPT	14.0884	0.530519	0.149928	0.380591	0	339
psd	Oxycodone Hydrochloride	12.8521	0.680637	0.356159	0.324477	0	343
dose	PO	11.6544	0.70483	0.193769	0.511061	0	109
adversary events	Multiple organ dysfunction syndrome	11.1234	0.732651	0.35792	0.374731	0	169
adversary events	Accidental overdose	10.8489	0.603943	0.356309	0.247634	0	433
adversary events	Overdose	10.7882	0.470014	0.351058	0.118956	0	2104
adversary events	Pneumonia	9.49749	0.586889	0.356799	0.23009	0	408
adversary events	Myocardial infarction	9.19396	0.646387	0.357947	0.28844	0	217
psd	Alprazolam	9.10819	0.573858	0.356843	0.217015	0	427
psd	Fentanyl	7.66231	0.557094	0.357638	0.199456	9.1e-15	356
adversary events	Brain oedema	7.09202	0.661725	0.358866	0.302859	6.61e-13	124
adversary events	Pulmonary embolism	7.07617	0.664535	0.358909	0.305625	7.41e-13	119
psd	Citalopram Hydrobromide	6.1576	0.534196	0.358282	0.175915	3.69e-10	304
adversary events	Sepsis	5.92813	0.58202	0.358852	0.223168	1.53e-09	170
psd	Quetiapine Fumarate	5.45874	0.555721	0.358872	0.19685	2.4e-08	190
indication	ANALGESIC THERAPY	5.28351	0.305934	0.157545	0.148389	6.34e-08	269
adversary events	Respiratory depression	5.11925	0.478129	0.358278	0.119851	1.53e-07	447
adversary events	Medication error	5.00488	0.51498	0.358794	0.156186	2.79e-07	253
adversary events	Circulatory collapse	4.84361	0.522562	0.358978	0.163585	6.38e-07	211
adversary events	Toxic epidermal necrolysis	4.45354	0.541082	0.359277	0.181805	4.22e-06	145
psd	Zolpidem Tartrate	4.43301	0.498401	0.358939	0.139462	4.65e-06	255
psd	Mirtazapine	4.1	0.509541	0.359268	0.150273	2.07e-05	177
psd	Sertraline Hydrochloride	3.97501	0.485558	0.359098	0.12646	3.52e-05	247
psd	Gabapentin	3.71502	0.447649	0.35883	0.0888193	0.000101595	434
gender	Male	3.62421	0.365468	0.343632	0.0218366	0.000144921	10840
adversary events	Drug level increased	3.35266	0.514527	0.359579	0.154948	0.0004002	117
adversary events	Cardiac failure	3.0528	0.493663	0.359605	0.134059	0.00113358	130
psd	Acetaminophen	2.78924	0.419419	0.359088	0.0603306	0.00264162	522
psd	Clonazepam	2.71638	0.468596	0.35962	0.108976	0.00329996	156
indication	DEPRESSION	2.24837	0.204985	0.159402	0.0455824	0.0122762	399
indication	SCIATICA	1.81061	0.227537	0.160256	0.0672813	0.0351006	122
psd	Fluoxetine Hydrochloride	1.80285	0.443681	0.359891	0.0837905	0.035706	115
psd	Venlafaxine Hydrochloride	1.72545	0.424544	0.359831	0.0647127	0.042223	174

## Sheet: second root results of dataset2
Feature	value	z score	probability of do value	probability of not do value	probability difference	p value	support
adversary events	Completed suicide	253.473	0.999921	0.287271	0.712649	0	2871
adversary events	Death	238.291	0.999865	0.322647	0.677218	0	1598
adversary events	Cardio-respiratory arrest	63.9025	0.927351	0.34424	0.583111	0	847
adversary events	Toxicity to various agents	53.8272	0.702598	0.300011	0.402586	0	4220
adversary events	Asphyxia	42.4793	0.968017	0.358858	0.609159	0	157
adversary events	Drug abuse	39.907	0.747034	0.334281	0.412753	0	1854
adversary events	Cardiac arrest	34.2654	0.813648	0.348541	0.465108	0	810
adversary events	Respiratory arrest	27.4402	0.797465	0.352621	0.444844	0	597
psd	Hydrocodone Bitartrate	22.343	0.902698	0.359437	0.543261	0	147
psd	Diphenhydramine Hydrochloride	21.5867	0.894724	0.359619	0.535105	0	140
adversary events	Pulmonary oedema	20.1489	0.806117	0.357211	0.448906	0	313
adversary events	Poisoning	19.38	0.77875	0.356918	0.421832	0	352
age	40-64	18.1843	0.439482	0.323166	0.116316	0	9171
dose	ORAL	18.0482	0.504256	0.173413	0.330842	0	725
psd	Diazepam	16.0177	0.737009	0.357578	0.379432	0	344
age	18-39	15.6401	0.455631	0.340753	0.114878	0	5773
psd	Morphine Sulfate	15.0797	0.722625	0.357802	0.364823	0	341
indication	SUICIDE ATTEMPT	14.3886	0.532394	0.145429	0.386966	0	339
psd	Oxycodone Hydrochloride	12.5102	0.67273	0.358411	0.314319	0	343
dose	PO	11.3454	0.684879	0.192677	0.492202	0	109
adversary events	Accidental overdose	11.2595	0.611757	0.358341	0.253417	0	433
adversary events	Multiple organ dysfunction syndrome	10.6644	0.717583	0.360151	0.357432	0	169
adversary events	Overdose	10.4678	0.466847	0.353625	0.113222	0	2104
psd	Alprazolam	9.53609	0.584057	0.358839	0.225218	0	427
adversary events	Pneumonia	9.50181	0.586948	0.358954	0.227994	0	408
adversary events	Myocardial infarction	8.72729	0.63955	0.360143	0.279407	0	217
psd	Fentanyl	8.0125	0.566997	0.359659	0.207338	5.55112e-16	356
adversary events	Pulmonary embolism	7.33593	0.67019	0.361018	0.309172	1.10134e-13	119
adversary events	Brain oedema	7.08078	0.660898	0.361003	0.299895	7.1676e-13	124
psd	Citalopram Hydrobromide	6.37557	0.542226	0.360339	0.181887	9.1139e-11	304
adversary events	Sepsis	6.06359	0.582195	0.360988	0.221207	6.65573e-10	170
psd	Quetiapine Fumarate	5.86258	0.570496	0.360907	0.209589	2.2786e-09	190
adversary events	Respiratory depression	5.19086	0.479643	0.360412	0.119231	1.04662e-07	447
indication	ANALGESIC THERAPY	5.0827	0.293901	0.153412	0.140489	1.86057e-07	269
psd	Mirtazapine	4.87143	0.538208	0.361218	0.17699	5.53954e-07	177
adversary events	Toxic epidermal necrolysis	4.73994	0.54558	0.361388	0.184192	1.06893e-06	145
adversary events	Medication error	4.7339	0.507156	0.361011	0.146145	1.10121e-06	253
adversary events	Circulatory collapse	4.4711	0.506824	0.361241	0.145583	3.891e-06	211
psd	Zolpidem Tartrate	4.39955	0.49892	0.361078	0.137842	5.42383e-06	255
psd	Sertraline Hydrochloride	4.13244	0.490352	0.361197	0.129155	1.79466e-05	247
psd	Gabapentin	3.66803	0.448238	0.360978	0.0872594	0.000122214	434
gender	Male	3.65322	0.367059	0.345218	0.0218409	0.000129488	10840
adversary events	Drug level increased	3.28607	0.512609	0.36172	0.150889	0.00050797	117
psd	Acetaminophen	2.9375	0.424125	0.361162	0.0629627	0.00165437	522
adversary events	Cardiac failure	2.77969	0.481504	0.361797	0.119707	0.00272052	130
psd	Clonazepam	2.46386	0.459573	0.361808	0.0977645	0.00687245	156
indication	DEPRESSION	1.91105	0.192768	0.155367	0.0374016	0.027999	399
psd	Ibuprofen	1.73147	0.418601	0.361923	0.0566778	0.041684	214

[truncated: 5 more sheets: third root results of dataset 3, first causal tree of dataset 2, second causal tree of dataset 2, third causal tree of dataset 2, Classification results]
